# Supplementary material
Source: PubMed Central journal article supplement (PMC6545696)
Supplement: Supplemental_Material.pdf [file Supplemental_Material.pdf]

**SUPPLEMENTAL TABLE 1**

Individual predicted and measured total liver reserves (TLR) of piglets, 4, 7 or 14 d after receiving 1.75  $\mu\text{mol } ^{13}\text{C}_2$ -retinyl acetate.

| Day killed | Serum retinol <sup>a</sup><br>( $\mu\text{mol/L}$ ) | Predicted TLR <sup>b</sup><br>( $\mu\text{mol/g}$ ) | Measured TLR <sup>a</sup><br>( $\mu\text{mol/g}$ ) |
|------------|-----------------------------------------------------|-----------------------------------------------------|----------------------------------------------------|
| 0          | 0.69                                                | -                                                   | 0.035                                              |
|            | 0.80                                                | -                                                   | 0.012                                              |
|            | 0.77                                                | -                                                   | 0.043                                              |
|            | 0.39                                                | -                                                   | 0.035                                              |
|            | 1.51                                                | -                                                   | 0.035                                              |
| 4          | 0.56                                                | 0.008                                               | 0.013                                              |
|            | 0.95                                                | 0.017                                               | 0.041                                              |
|            | 0.84                                                | 0.009                                               | 0.013                                              |
|            | 0.74                                                | 0.033                                               | 0.014                                              |
|            | 0.93                                                | 0.013                                               | 0.021                                              |
| 7          | 0.56                                                | 0.019                                               | 0.020                                              |
|            | 0.53                                                | 0.012                                               | 0.026                                              |
|            | 1.20                                                | 0.092                                               | 0.035                                              |
|            | 0.84                                                | 0.018                                               | 0.029                                              |
|            | 1.00                                                | 0.011                                               | 0.018                                              |
|            | 0.79                                                | 0.015                                               | 0.042                                              |
|            | 0.57                                                | 0.017                                               | 0.027                                              |
| 14         | 0.70                                                | 0.010                                               | 0.006                                              |
|            | 0.68                                                | 0.013                                               | 0.020                                              |
|            | 0.61                                                | 0.012                                               | 0.011                                              |
|            | 0.72                                                | 0.015                                               | 0.017                                              |
|            | 0.73                                                | 0.071                                               | 0.008                                              |
|            | 0.94                                                | 0.015                                               | 0.009                                              |
|            | 0.75                                                | 0.017                                               | 0.016                                              |

<sup>a</sup> Determined by HPLC.

<sup>b</sup> Determined by retinol isotope dilution.
